# Supplementary material for: Whole‐genome duplications followed by tandem duplications drive diversification of the protein modifier SUMO in Angiosperms
Source: PubMed Central journal article supplement (PMC6680281; doi:10.1111/nph.13911), 2016-03-02
Supplement: NPH-211-172-s001.pdf [file NPH-211-172-s001.pdf]

## ***New Phytologist* Supporting Information**

Article title: **Whole-genome duplications followed by tandem-duplications drive diversification of the protein modifier SUMO in Angiosperms**

Authors: Valentin Hammoudi, Georgios Vlachakis, M. Eric Schranz and Harrold A. van den Burg

Article acceptance date: 10 January 2016

The following Supporting Information is available for this article:

**Fig. S1** Frequency distribution of the synonymous substitutions per synonymous site (Ks) for the retained ninety gene duplicates in the *AtSUMO1* and -2 duplication block.

**Fig. S2** Brassicaceae *SUMO5* evolved from an ancient *SUMO-like* paralog found in eudicots (see separate Excel file).

**Fig. S3** Brassicaceae *SUMO4* originates from an archetype *SUMO* that diversified after the split of Brassicaceae and Cleomaceae.

**Fig. S4** Maximum likelihood (ML) tree of Brassicaceae *SUMO1*, -2, and -3 genes indicating that *Aethionema arabicum SUMO2* groups sister to the *SUMO2* and *SUMO3* clades.

**Fig. S5** Gene tree of the individual UBL domains of DSUL locus in grasses with gene identifiers and bootstrap support values indicated.

**Table S1** List of the different plant genomes used in this study.

**Table S2** Annotation of the Brassicaceae SUMO paralogs including expression details.

**Table S3** Gene IDs of the here studied dicot *SUMO/SUL* genes in the three different genomic regions: *SUMO-γA* (AtSUMO4), *SUMO-γB* (AtSUMO1/2), and *SUL-γC* (AtSUMO5).

**Table S4** Summary of the synteny between *A. lyrata SUMO5* (ID: 16062200; A14g17860) and the SUMO and SUL genes of the basal eudicots grape vine (*V. vinifera*) and eucalyptus (*E. grandis*).

**Fig. S1** Frequency distribution of the synonymous substitutions per synonymous site ( $K_s$ ) for the retained 90 gene duplicates in the *AtSUMO1* (At4g26840) and -2 (At5g55160) duplication block. The mean  $K_s$  of the *AtSUMO1*  $\leftrightarrow$  *AtSUMO2* block is calculated using the 90 gene pairs. For comparison, the mean  $K_s$  is given for the At- $\alpha$  and At- $\beta$  WGDs duplication blocks in *A. thaliana* (Kagale *et al.*, 2014). The bin sizes depicted is 0.1 number of substitutions per synonymous site with the first bin ranging from 0 to 0.1 substitutions per synonymous site. Data is obtained from the Plant Genome Duplication Database.

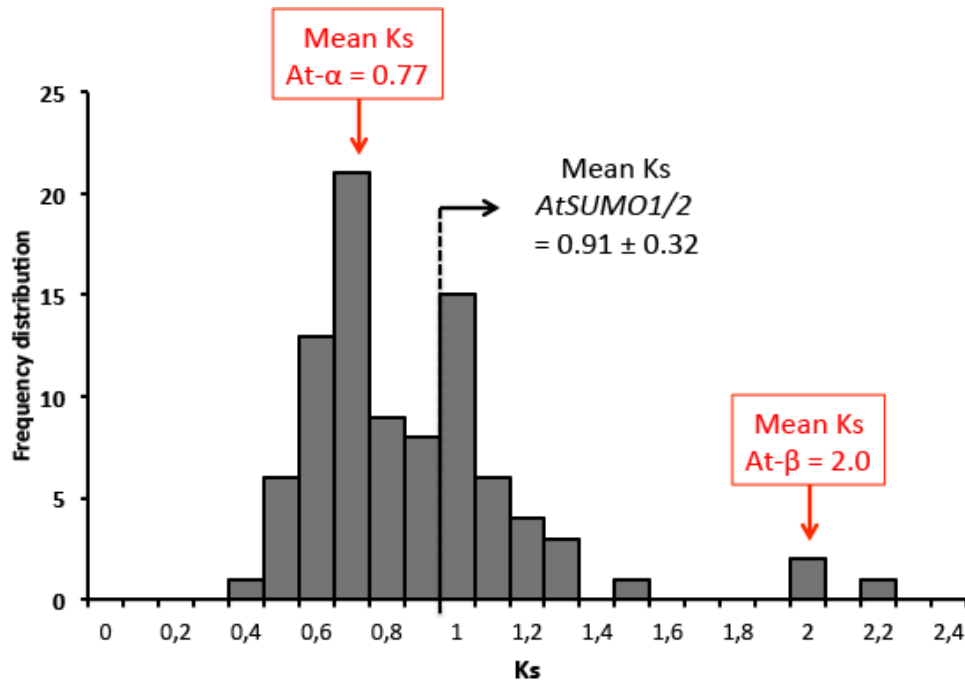

### Reference

Kagale S, Robinson SJ, Nixon J, Xiao R, Huebert T, Condie J, Kessler D, Clarke WE, Edger PP, Links MG *et al.* 2014. Polyploid evolution of the Brassicaceae during the Cenozoic era. *Plant Cell* **26**: 2777–2791.

**Fig. S2** Brassicaceae *SUMO5* evolved from an ancient *SUMO-like* paralog found in eudicots. (a) Schematic representation of the gene synteny between the *SUMO5* genomic regions of *Arabidopsis* (At2g32765), *T. hassleriana* (*Th15853* loci), and eucalyptus (*E. grandis*) *SUL* gene *Eucgr.H00049*. *SUMO5* is syntenic paralog of a divergent *SUL* gene in eucalyptus. Apparently, *Arabidopsis SUMO5* and *Eucgr.H00049* have diversified since their split from their last common ancestor. The genomic position on three different contigs is indicated. (b) Taxonomic tree with the position of grape, eucalyptus (lineage Myrtales) and the true Rosids (Eurosids), which includes Fabidae (strawberry, soybean) and Malvidae (poplar, Brassicaceae, and *T. hassleriana*).

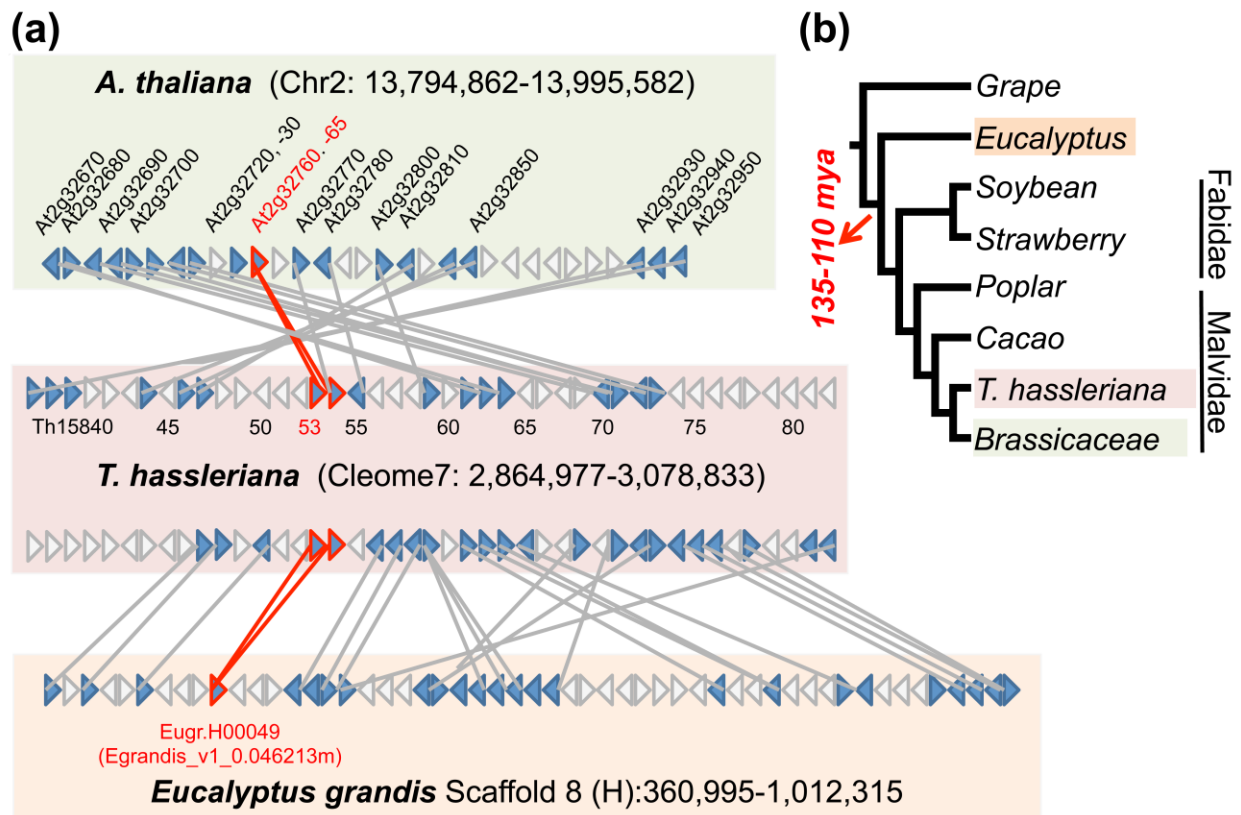

**Figure S2**

**Fig. S3** Brassicaceae *SUMO4* originates from an archetype *SUMO* that diversified after the split of Brassicaceae and Cleomaceae. Genomic collinearity between the *AtSUMO4* and -6 (*At5g48700*, -710) locus in *A. thaliana* and the *Th26484*, -85, and -86 locus in *T. hassleriana* indicates that these five genes represent syntenic paralogues. *Th26486* represents an incomplete tandem duplication of *Th26484* or -85 genes in the genome assembly, while *Th26484* and -85 appear to be functional *SUMO* genes.

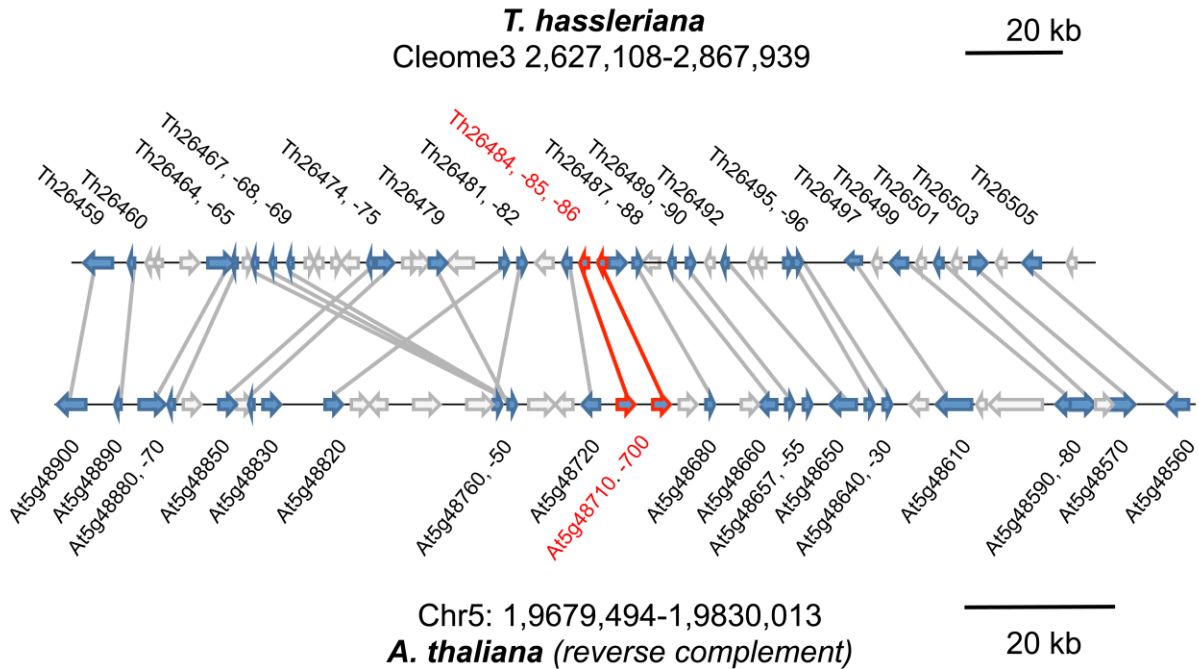

**Figure S3**

**Fig. S4** Maximum likelihood (ML) tree of Brassicaceae *SUMO1*, -2, and -3 genes indicating that *Aethionema arabicum* *SUMO2* groups sister to the *SUMO2* and *SUMO3* clades. The tandem duplication of *SUMO2*::*SUMO3* occurred after the split of *Aethionema* genus. Both *SUMO1/2* are conserved at the sequence level (short branch lengths) across Brassicaceae, while *SUMO3* has diversified, been lost, or pseudogenized during the same period. A gene conversion event in *E. salsugineum* has converted *SUMO3* in a -2 paralog (gene ID Thhalv10015081); which is marked with an asterisks (\*). Numbers on the nodes represent bootstrap support values (%) of the individual braches. The scale bar corresponds to the number of nucleotide substitutions per site. The *SUMO1/2* sequences from *T. hassleriana* and *Cleome gynandra* were used as outgroup.

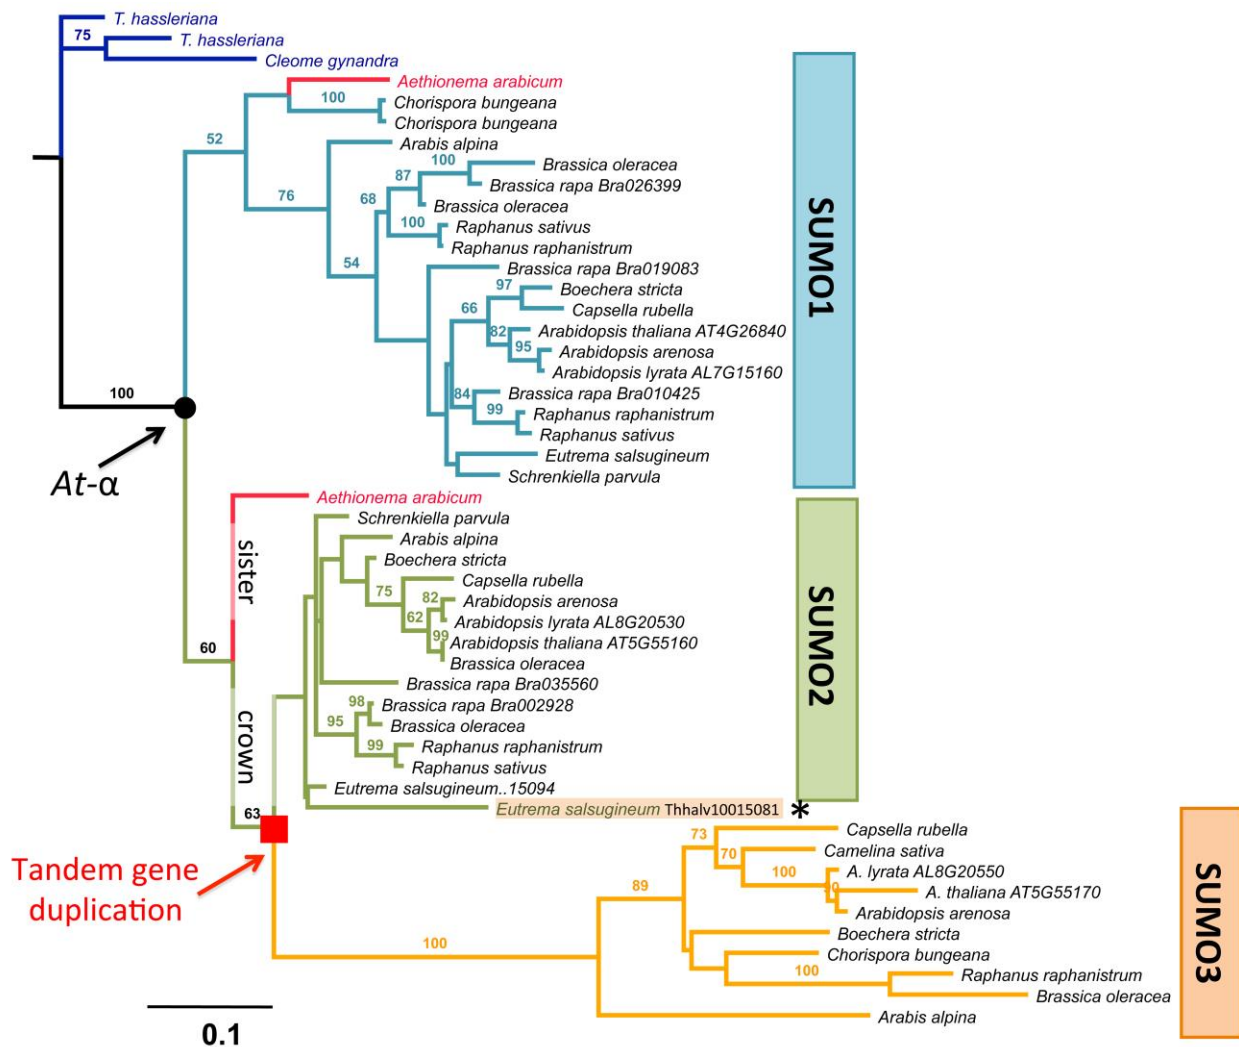

**Figure S4**

**Fig. S5** Gene tree of the individual UBL domains of *DSUL* locus in grasses with gene identifiers and bootstrap support values indicated.

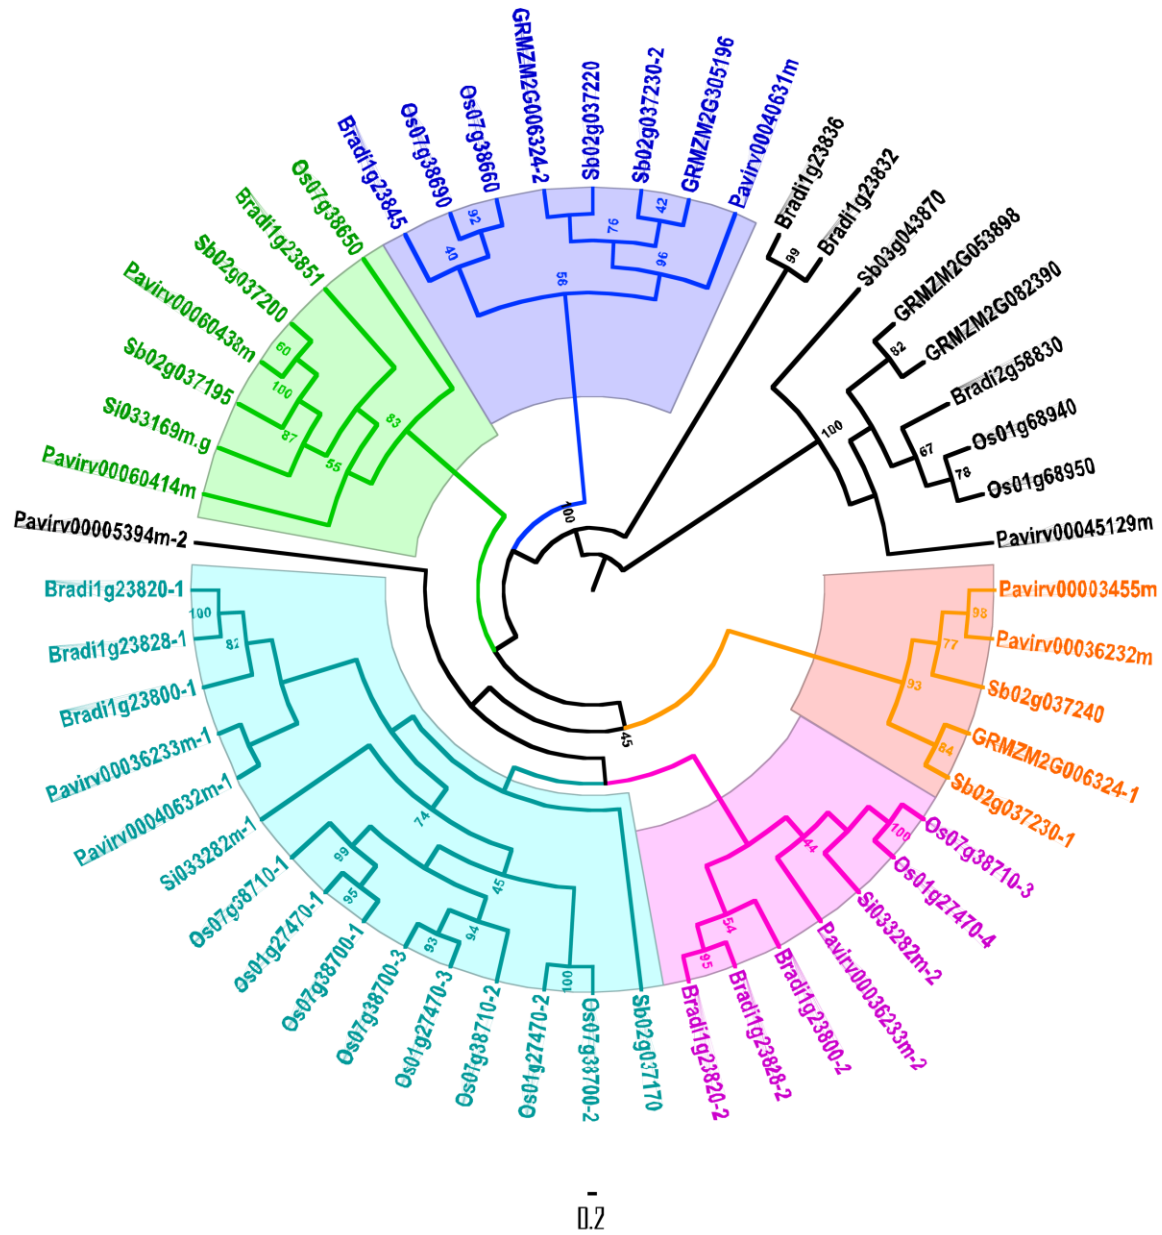

**Figure S5**

**Table S1** List of the different plant genomes used in this study.

| Species Name                                                        | Common name                 | Number of Archetype SUMOs | Number of SUMO Paralogs | Genome version | Source                                              | Website                                                                                                                                                                                               | Ref. |
|---------------------------------------------------------------------|-----------------------------|---------------------------|-------------------------|----------------|-----------------------------------------------------|-------------------------------------------------------------------------------------------------------------------------------------------------------------------------------------------------------|------|
| <b>Brassicaceae</b>                                                 |                             |                           |                         |                |                                                     |                                                                                                                                                                                                       |      |
| <i>Aethionema arabicum</i>                                          | N/A                         | 2 (*)                     | 2                       | v2.5           | CoGE                                                | <a href="http://genomeevolution.org/">genomeevolution.org/</a>                                                                                                                                        | [1]  |
| <i>Arabidopsis arenosa</i>                                          | Sand Rock-cress             | 2 (*)                     | 4                       | -              | Luca Comai (UC Davis, USA)                          | <a href="http://comaiwiki.genomecenter.ucdavis.edu">comaiwiki.genomecenter.ucdavis.edu</a>                                                                                                            | N/A  |
| <i>Arabidopsis halleri</i>                                          | N/A                         | 2                         | 4                       | v.1.1          | Phytozome 10.1                                      | <a href="http://phytozome.jgi.doe.gov">phytozome.jgi.doe.gov</a>                                                                                                                                      | N/A  |
| <i>Arabidopsis lyrata</i>                                           | Lyrata rockcress            | 3 (*,#)                   | 5                       | v1.0           | PGDD, Phytozome 10.1                                | <a href="http://chibba.agtec.uga.edu/duplication/">chibba.agtec.uga.edu/duplication/</a> ,<br><a href="http://phytozome.jgi.doe.gov">phytozome.jgi.doe.gov</a>                                        | [2]  |
| <i>Arabidopsis thaliana</i>                                         | Arabidopsis                 | 2 (*,#)                   | 6                       | TAIR10         | TAIR                                                | <a href="http://www.arabidopsis.org">www.arabidopsis.org</a>                                                                                                                                          | [3]  |
| <i>Arabis alpina</i>                                                | Alpine Rock Cress           | 2 (*)                     | 3                       | V4             | NCBI                                                | NCBI ID: GCA_000733195.1                                                                                                                                                                              | [4]  |
| <i>Boechera stricta</i>                                             | Drummond's rockcress        | 2 (*)                     | 4                       | v1.2           | Phytozome 10.1                                      | <a href="http://phytozome.jgi.doe.gov">phytozome.jgi.doe.gov</a>                                                                                                                                      | N/A  |
| <i>Brassica napus</i>                                               | Rapeseed                    | N/A                       | N/A                     | N/A            | JCVI                                                | <a href="http://brassica.jcvi.org/cgi-bin/brassica/gbrowse.cgi">brassica.jcvi.org/cgi-bin/brassica/gbrowse.cgi</a>                                                                                    | N/A  |
| <i>Brassica oleracea</i>                                            | Cauliflower                 | 5 (*,#)                   | 6                       | v2.1           | BRAD                                                | <a href="http://brassicadb.org">brassicadb.org</a> ,                                                                                                                                                  | [5]  |
| <i>Brassica rapa</i>                                                | Turnip                      | 5 (*,#)                   | 7                       | v1.3           | BRAD                                                | <a href="http://brassicadb.org">brassicadb.org</a> ,                                                                                                                                                  | [6]  |
| <i>Capsella rubella</i>                                             | Capsella                    | 2 (*,#)                   | 4                       | v1.0           | Phytozome 10.1                                      | <a href="http://phytozome.jgi.doe.gov">phytozome.jgi.doe.gov</a>                                                                                                                                      | [7]  |
| <i>Chorispora bungeana</i>                                          | Blue mustard                | N/A (*)                   | N/A                     | N/A            | NCBI WGS, TSA                                       | NCBI ID: GCA_000715565.1                                                                                                                                                                              | [8]  |
| <i>Eutrema salsugineum</i> (syn. <i>Theellungiella halophilla</i> ) | N/A                         | 3 (*)                     | 3                       | v1.0           | Phytozome 10.1                                      | <a href="http://phytozome.jgi.doe.gov">phytozome.jgi.doe.gov</a>                                                                                                                                      | [9]  |
| <i>Leavenworthia alabamica</i>                                      | Rollins Alabama glade cress | N/A                       | N/A                     | v0.2           | CoGE                                                | <a href="http://genomeevolution.org/">genomeevolution.org/</a>                                                                                                                                        | [1]  |
| <i>Neslia paniculata</i>                                            | Ballmustard                 | N/A                       | N/A                     | N/A            | CoGE                                                | <a href="http://genomeevolution.org/">genomeevolution.org/</a>                                                                                                                                        | N/A  |
| <i>Raphanus raphanistrum</i>                                        | Wild radish                 | N/A (*)                   | N/A                     | v1.0           | RadishBase (EST)                                    | <a href="http://bin/radish/index.cgi">bin/radish/index.cgi</a>                                                                                                                                        | [10] |
| <i>Raphanus sativus</i>                                             | Radish                      | N/A (*)                   | N/A                     | v1.0           | <i>Raphanus sativus</i> genome database, NCBI (TSA) | <a href="http://bioinfo.bti.cornell.edu/cgi-bin/radish.kazusa.or.jp/blast.html">bioinfo.bti.cornell.edu/cgi-bin/radish.kazusa.or.jp/blast.html</a> ,<br>Genbank: JW988067-JW999999, KA000001-KA089547 | [11] |
| <i>Schrenkiella parvula</i>                                         | N/A                         | 2 (*)                     | 2                       | v2             | CoGE,                                               | <a href="http://genomeevolution.org/">genomeevolution.org/</a> ,                                                                                                                                      | [12] |

|                                      |                         |         |     |             |                               |                                                                                                                                                                                                                                                                      |      |
|--------------------------------------|-------------------------|---------|-----|-------------|-------------------------------|----------------------------------------------------------------------------------------------------------------------------------------------------------------------------------------------------------------------------------------------------------------------|------|
| (syn. <i>Thellungiella parvula</i> ) |                         |         |     |             | Thellungiella.org             | <a href="http://Thellungiella.org/">Thellungiella.org/</a>                                                                                                                                                                                                           |      |
| <i>Sisymbrium irio</i>               | London rocket           | N/A     | N/A | V2.5        | CoGE                          | <a href="http://genomeevolution.org/">genomeevolution.org/</a>                                                                                                                                                                                                       | [1]  |
| <b>Dicots<br/>(non-Brassicaceae)</b> |                         |         |     |             |                               |                                                                                                                                                                                                                                                                      |      |
| <i>Amborella trichopoda</i>          | Amborella               | 1       | 0   | v1.0        | AGD                           | <a href="http://www.amborella.org">www.amborella.org</a>                                                                                                                                                                                                             | [13] |
| <i>Beta vulgaris</i>                 | Sugar beat              | 1 (#)   | 5   | RefBeet-1.1 | PGDD                          | <a href="http://chibba.agtec.uga.edu/duplication/">chibba.agtec.uga.edu/duplication/</a> ,<br><a href="http://bvseq.molgen.mpg.de/index.shtml">bvseq.molgen.mpg.de/index.shtml</a>                                                                                   | [14] |
| <i>Cajanus cajan</i>                 | Pigeon pea              | 1 (#)   | ND  | Nov 2011    | PGDD                          | <a href="http://chibba.agtec.uga.edu/duplication/">chibba.agtec.uga.edu/duplication/</a>                                                                                                                                                                             | [15] |
| <i>Carica papaya</i>                 | Papaya                  | 2 (*,#) | 0   | ASGPBv0.4   | PGDD                          | <a href="http://chibba.agtec.uga.edu/duplication/">chibba.agtec.uga.edu/duplication/</a>                                                                                                                                                                             | [16] |
| <i>Cicer arietinum</i>               | Chickpea                | 3 (#)   | 1   | v1.0        | PGDD                          | <a href="http://chibba.agtec.uga.edu/duplication/">chibba.agtec.uga.edu/duplication/</a> ,<br><a href="http://legumeinfo.org/">legumeinfo.org/</a>                                                                                                                   | [17] |
| <i>Citrullus lanatus</i>             | Watermelon              | 2(#)    | 1   | v1.0        | PGDD                          | <a href="http://chibba.agtec.uga.edu/duplication/">chibba.agtec.uga.edu/duplication/</a>                                                                                                                                                                             | [18] |
| <i>Citrus sinensis</i>               | Sweet orange            | 2 (*,#) | 2   | v1.1        | PGDD,<br>Phytozome 10.1       | <a href="http://chibba.agtec.uga.edu/duplication/">chibba.agtec.uga.edu/duplication/</a> ,<br><a href="http://phytozome.jgi.doe.gov">phytozome.jgi.doe.gov</a>                                                                                                       | [19] |
| <i>Cucumis sativus</i>               | Cucumber                | 2 (*,#) | 1   | v1.0        | PGDD,<br>Phytozome 10.1       | <a href="http://chibba.agtec.uga.edu/duplication/">chibba.agtec.uga.edu/duplication/</a> ,<br><a href="http://phytozome.jgi.doe.gov">phytozome.jgi.doe.gov</a> ,<br><a href="http://www.icugi.org/cgi-bin/IcuGI/index.cgi">www.icugi.org/cgi-bin/IcuGI/index.cgi</a> | [20] |
| <i>Eucalyptus grandis</i>            | Eucalyptus, Flooded gum | 3 (#)   | 4   | v1.1        | PGDD, CoGE,<br>Phytozome 10.1 | <a href="http://chibba.agtec.uga.edu/duplication/">chibba.agtec.uga.edu/duplication/</a> ,<br><a href="http://genomeevolution.org/">genomeevolution.org/</a>                                                                                                         | [21] |
| <i>Fragaria vesca</i>                | Strawberry              | 3 (*,#) | 3   | v1.1        | PGDD,<br>Phytozome 10.1       | <a href="http://chibba.agtec.uga.edu/duplication/">chibba.agtec.uga.edu/duplication/</a> ,<br><a href="http://phytozome.jgi.doe.gov">phytozome.jgi.doe.gov</a>                                                                                                       | [22] |
| <i>Glycine max</i>                   | Soybean                 | 3(*,#)  | 3   | Wm82.a2.v1  | PGDD,<br>Phytozome 10.1       | <a href="http://chibba.agtec.uga.edu/duplication/">chibba.agtec.uga.edu/duplication/</a> ,<br><a href="http://www.icugi.org/cgi-bin/IcuGI/index.cgi">www.icugi.org/cgi-bin/IcuGI/index.cgi</a>                                                                       | [23] |
| <i>Gossypium raimondii</i>           | Cotton                  | 6 (*,#) | 4   | v2.1        | PGDD,<br>CoGE                 | <a href="http://chibba.agtec.uga.edu/duplication/">chibba.agtec.uga.edu/duplication/</a> ,<br><a href="http://genomeevolution.org/">genomeevolution.org/</a>                                                                                                         | [24] |
| <i>Malus domestica</i>               | Apple                   | 6 (*)   | N/A | v1.0        | PGDD                          | <a href="http://chibba.agtec.uga.edu/duplication/">chibba.agtec.uga.edu/duplication/</a>                                                                                                                                                                             | [25] |
| <i>Medicago truncatula</i>           | Barrel medic            | 2 (#)   | 6   | Mt4.0v1     | PGDD                          | <a href="http://chibba.agtec.uga.edu/duplication/">chibba.agtec.uga.edu/duplication/</a>                                                                                                                                                                             | [26] |
| <i>Nelumbo nucifera</i>              | Sacred lotus            | 2 (#)   | 2   | v1.0        | PGDD                          | <a href="http://chibba.agtec.uga.edu/duplication/">chibba.agtec.uga.edu/duplication/</a> ,<br>NCBI: PRJNA16800                                                                                                                                                       | [27] |
| <i>Phaseolus vulgaris</i>            | Common bean             | 2 (*,#) | 1   | v1.0        | PGDD                          | <a href="http://chibba.agtec.uga.edu/duplication/">chibba.agtec.uga.edu/duplication/</a>                                                                                                                                                                             | [28] |
| <i>Populus trichocarpa</i>           | Western poplar          | 4 (*,#) | 0   | v3.0        | PGDD                          | <a href="http://chibba.agtec.uga.edu/duplication/">chibba.agtec.uga.edu/duplication/</a>                                                                                                                                                                             | [29] |
| <i>Prunus mume</i>                   | Chinese plum            | 3 (#)   | 2   | v1.0        | PGDD                          | <a href="http://chibba.agtec.uga.edu/duplication/">chibba.agtec.uga.edu/duplication/</a>                                                                                                                                                                             | [30] |
| <i>Prunus persica</i>                | Peach                   | 3 (*,#) | 5   | v1.0        | PGDD                          | <a href="http://chibba.agtec.uga.edu/duplication/">chibba.agtec.uga.edu/duplication/</a>                                                                                                                                                                             | [31] |
| <i>Pyrus bretschneideri</i>          | Pear                    | 5 (#)   | 2   | v1.0        | PGDD                          | <a href="http://chibba.agtec.uga.edu/duplication/">chibba.agtec.uga.edu/duplication/</a>                                                                                                                                                                             | [32] |
| <i>Ricinus communis</i>              | Castor bean             | 2 (*,#) | 1   | v0.1        | PGDD                          | <a href="http://chibba.agtec.uga.edu/duplication/">chibba.agtec.uga.edu/duplication/</a>                                                                                                                                                                             | [33] |



|                                                               |                       |         |     |                      |                            |                                                                                                                                                                        |      |
|---------------------------------------------------------------|-----------------------|---------|-----|----------------------|----------------------------|------------------------------------------------------------------------------------------------------------------------------------------------------------------------|------|
| <i>Tarenaya hassleriana</i><br>( <i>syn. Cleome spinosa</i> ) | Prickly Spider Flower | 5 (*)   | 2   | v4                   | CoGE                       | <a href="http://genomeevolution.org/">genomeevolution.org/</a>                                                                                                         | [34] |
| <i>Theobroma cacao</i>                                        | Cacao                 | 2 (*,#) | 3   | v1.1                 | PGDD, CoGE, Phytozome 10.1 | <a href="http://chibba.agtec.uga.edu/duplication/">chibba.agtec.uga.edu/duplication/</a> ,<br><a href="http://phytozome.jgi.doe.gov">phytozome.jgi.doe.gov</a>         | [35] |
| <i>Vitis vinifera</i>                                         | Grapevine             | 3 (*,#) | 2   | Genoscope (Aug 2007) | PGDD, Phytozome 10.1       | <a href="http://chibba.agtec.uga.edu/duplication/">chibba.agtec.uga.edu/duplication/</a> ,<br><a href="http://phytozome.jgi.doe.gov">phytozome.jgi.doe.gov</a>         | [36] |
| <b>Asterids</b>                                               |                       |         |     |                      |                            |                                                                                                                                                                        |      |
| <i>Actinidia chinensis</i>                                    | Kiwifruit             | 3 (#)   | 1   | May 2013             | PGDD                       | <a href="http://chibba.agtec.uga.edu/duplication/">chibba.agtec.uga.edu/duplication/</a>                                                                               | [37] |
| <i>Capsicum annuum</i>                                        | Hot pepper            | 2 (#)   | 2   | v1.55                | PGDD                       | <a href="http://chibba.agtec.uga.edu/duplication/">chibba.agtec.uga.edu/duplication/</a><br><a href="http://peppersequence.genomic.cn/">peppersequence.genomic.cn/</a> | [38] |
| <i>Mimulus guttatus</i>                                       | Monkey flower         | 2 (*)   | 4   | V2.0                 | Phytozome 10.1             | <a href="http://phytozome.jgi.doe.gov">phytozome.jgi.doe.gov</a>                                                                                                       | [39] |
| <i>Solanum lycopersicum</i>                                   | Tomato                | 3 (*,#) | 2   | v2.4                 | PGDD, SOL Genomics Network | <a href="http://chibba.agtec.uga.edu/duplication/">chibba.agtec.uga.edu/duplication/</a> ,<br><a href="http://solgenomics.net/">solgenomics.net/</a>                   | [40] |
| <i>Solanum tuberosum</i>                                      | Potato                | 2 (*,#) | 5   | v3.4                 | PGDD                       | <a href="http://chibba.agtec.uga.edu/duplication/">chibba.agtec.uga.edu/duplication/</a>                                                                               | [41] |
| <b>Monocots</b>                                               |                       |         |     |                      |                            |                                                                                                                                                                        |      |
| <i>Brachypodium distachyon</i>                                | Purple false brome    | 1 (*)   | 8   | v2.1                 | PGDD                       | <a href="http://chibba.agtec.uga.edu/duplication/">chibba.agtec.uga.edu/duplication/</a>                                                                               | [42] |
| <i>Oryza sativa</i>                                           | Rice                  | 2 (*)   | 6   | v7.0                 | PGDD, Phytozome 10.1       | <a href="http://chibba.agtec.uga.edu/duplication/">chibba.agtec.uga.edu/duplication/</a> ,<br><a href="http://phytozome.jgi.doe.gov">phytozome.jgi.doe.gov</a>         | [43] |
| <i>Setaria italica</i>                                        | Foxtail millet        | ND      | ND  | v2.1                 | Phytozome 10.1             | <a href="http://phytozome.jgi.doe.gov">phytozome.jgi.doe.gov</a>                                                                                                       | [44] |
| <i>Sorghum bicolor</i>                                        | Sorghum               | 1 (*)   | 8   | v2.1                 | PGDD                       | <a href="http://chibba.agtec.uga.edu/duplication/">chibba.agtec.uga.edu/duplication/</a>                                                                               | [45] |
| <i>Musa acuminata</i>                                         | Banana                | 4 (*)   | ND  | July 2012            | PGDD                       | <a href="http://chibba.agtec.uga.edu/duplication/">chibba.agtec.uga.edu/duplication/</a>                                                                               | [46] |
| <i>Panicum virgatum</i>                                       | Switchgrass           | N/A     | N/A | v1.1                 | Phytozome 10.1             | <a href="http://phytozome.jgi.doe.gov">phytozome.jgi.doe.gov</a>                                                                                                       | N/A  |
| <i>Zea mays</i>                                               | Maize                 | 2 (*)   | 4   | v6a                  | PGDD                       | <a href="http://chibba.agtec.uga.edu/duplication/">chibba.agtec.uga.edu/duplication/</a>                                                                               | [47] |
| <i>Elaeis guineensis</i>                                      | Oil palm              | 3       | ND  | v2.0                 | PGDD                       | <a href="http://chibba.agtec.uga.edu/duplication/">chibba.agtec.uga.edu/duplication/</a>                                                                               | [48] |

**Footnotes:**

N/A, (1) Not or poorly annotated genome assembly limited our estimate of the number of SUMOs/SULs. (2) Publication unknown.

ND, Not determined.

\*, Archetype SUMO sequences from this species were used to generate the gene tree in Figure 2.

#, SUMO & SUL sequences from this species are represented in Figure 5, where they form jointly the SUMO-SUL network.

## References

1. **Haudry, A., A.E. Platts, E. Vello, D.R. Hoen, M. Leclercq, R.J. Williamson, E. Forczek, Z. Joly-Lopez, J.G. Steffen, K.M. Hazzouri et al. 2013.** An atlas of over 90,000 conserved noncoding sequences provides insight into crucifer regulatory regions. *Nature Genetics* **45**: 891–898.
2. **Hu, T.T., P. Pattyn, E.G. Bakker, J. Cao, J.F. Cheng, R.M. Clark, N. Fahlgren, J.A. Fawcett, J. Grimwood, H. Gundlach et al. 2011.** The *Arabidopsis lyrata* genome sequence and the basis of rapid genome size change. *Nature Genetics* **43**: 476–481.
3. **The Arabidopsis Genome Initiative. 2000.** Analysis of the genome sequence of the flowering plant *Arabidopsis thaliana*. *Nature* **408**: 796–815.
4. **Willing, E.-M., V. Rawat, T. Mandáková, F. Maumus, G.V. James, K.J.V. Nordström, C. Becker, N. Warthmann, C. Chica, B. Szarzynska et al. 2015.** Genome expansion of *Arabis alpina* linked with retrotransposition and reduced symmetric DNA methylation. *Nature Plants* **1**: 14023.
5. **Parkin, I.A., C. Koh, H. Tang, S.J. Robinson, S. Kagale, W.E. Clarke, C.D. Town, J. Nixon, V. Krishnakumar, S.L. Bidwell et al. 2014.** Transcriptome and methylome profiling reveals relics of genome dominance in the mesopolyploid *Brassica oleracea*. *Genome Biology* **15**: R77.
6. **Wang, X., H. Wang, J. Wang, R. Sun, J. Wu, S. Liu, Y. Bai, J.H. Mun, I. Bancroft, F. Cheng et al. 2011.** The genome of the mesopolyploid crop species *Brassica rapa*. *Nature Genetics* **43**: 1035–1039.
7. **Slotte, T., K.M. Hazzouri, J.A. Agren, D. Koenig, F. Maumus, Y.L. Guo, K. Steige, A.E. Platts, J.S. Escobar, L.K. Newman et al. 2013.** The *Capsella rubella* genome and the genomic consequences of rapid mating system evolution. *Nature Genetics* **45**: 831–835.
8. **Zhao, Z., L. Tan, C. Dang, H. Zhang, Q. Wu, and L. An 2012.** Deep-sequencing transcriptome analysis of chilling tolerance mechanisms of a subnival alpine plant, *Chorispora bungeana*. *BMC Plant Biology* **12**: 222.
9. **Yang, R., D.E. Jarvis, H. Chen, M.A. Beilstein, J. Grimwood, J. Jenkins, S. Shu, S. Prochnik, M. Xin, C. Ma et al. 2013.** The reference genome of the halophytic plant *Eutrema salsugineum*. *Frontiers in Plant Science* **4**: 46.
10. **Moghe, G.D., D.E. Hufnagel, H. Tang, Y. Xiao, I. Dworkin, C.D. Town, J.K. Conner, and S.H. Shiu 2014.** Consequences of whole-genome triplication as revealed by comparative genomic analyses of the wild radish *Raphanus raphanistrum* and three other Brassicaceae species. *Plant Cell* **26**: 1925–1937.
11. **Kitashiba, H., F. Li, H. Hirakawa, T. Kawanabe, Z. Zou, Y. Hasegawa, K. Tonosaki, S. Shirasawa, A. Fukushima, S. Yokoi et al. 2014.** Draft sequences of the radish (*Raphanus sativus* L.) genome. *DNA Research* **21**: 481–490.
12. **Oh, D.H., H. Hong, S.Y. Lee, D.J. Yun, H.J. Bohnert, and M. Dassanayake 2014.** Genome structures and transcriptomes signify niche adaptation for the multiple-ion-tolerant extremophyte *Schrenkiella parvula*. *Plant Physiology* **164**: 2123–2138.
13. **Amborella Genome Project. 2013.** The Amborella genome and the evolution of flowering plants. *Science* **342**: 1241089.

14. **Dohm, J.C., A.E. Minoche, D. Holtgrawe, S. Capella-Gutierrez, F. Zakrzewski, H. Tafer, O. Rupp, T.R. Sorensen, R. Stracke, R. Reinhardt et al. 2014.** The genome of the recently domesticated crop plant sugar beet (*Beta vulgaris*). *Nature* **505**: 546–549.
15. **Varshney, R.K., W. Chen, Y. Li, A.K. Bharti, R.K. Saxena, J.A. Schlueter, M.T. Donoghue, S. Azam, G. Fan, A.M. Whaley et al. 2012.** Draft genome sequence of pigeonpea (*Cajanus cajan*), an orphan legume crop of resource-poor farmers. *Nature Biotechnology* **30**: 83–89.
16. **Ming, R., S. Hou, Y. Feng, Q. Yu, A. Dionne-Laporte, J.H. Saw, P. Senin, W. Wang, B.V. Ly, K.L. Lewis et al. 2008.** The draft genome of the transgenic tropical fruit tree papaya (*Carica papaya* Linnaeus). *Nature* **452**: 991–996.
17. **Varshney, R.K., C. Song, R.K. Saxena, S. Azam, S. Yu, A.G. Sharpe, S. Cannon, J. Baek, B.D. Rosen, B. Tar'an et al. 2013.** Draft genome sequence of chickpea (*Cicer arietinum*) provides a resource for trait improvement. *Nature Biotechnology* **31**: 240–246.
18. **Guo, S., J. Zhang, H. Sun, J. Salse, W.J. Lucas, H. Zhang, Y. Zheng, L. Mao, Y. Ren, Z. Wang et al. 2013.** The draft genome of watermelon (*Citrullus lanatus*) and resequencing of 20 diverse accessions. *Nature Genetics* **45**: 51–58.
19. **Xu, Q., L.L. Chen, X. Ruan, D. Chen, A. Zhu, C. Chen, D. Bertrand, W.B. Jiao, B.H. Hao, M.P. Lyon et al. 2013.** The draft genome of sweet orange (*Citrus sinensis*). *Nature Genetics* **45**: 59–66.
20. **Huang, S., R. Li, Z. Zhang, L. Li, X. Gu, W. Fan, W.J. Lucas, X. Wang, B. Xie, P. Ni et al. 2009.** The genome of the cucumber, *Cucumis sativus* L. *Nature Genetics* **41**: 1275–1281.
21. **Myburg, A.A., D. Grattapaglia, G.A. Tuskan, U. Hellsten, R.D. Hayes, J. Grimwood, J. Jenkins, E. Lindquist, H. Tice, D. Bauer et al. 2014.** The genome of *Eucalyptus grandis*. *Nature* **510**: 356–362.
22. **Shulaev, V., D.J. Sargent, R.N. Crowhurst, T.C. Mockler, O. Folkerts, A.L. Delcher, P. Jaiswal, K. Mockaitis, A. Liston, S.P. Mane et al. 2011.** The genome of woodland strawberry (*Fragaria vesca*). *Nature Genetics* **43**: 109–116.
23. **Schmutz, J., S.B. Cannon, J. Schlueter, J. Ma, T. Mitros, W. Nelson, D.L. Hyten, Q. Song, J.J. Thelen, J. Cheng et al. 2010.** Genome sequence of the palaeopolyploid soybean. *Nature* **463**: 178–183.
24. **Paterson, A.H., J.F. Wendel, H. Gundlach, H. Guo, J. Jenkins, D. Jin, D. Llewellyn, K.C. Showmaker, S. Shu, J. Udall et al. 2012.** Repeated polyploidization of *Gossypium* genomes and the evolution of spinnable cotton fibres. *Nature* **492**: 423–427.
25. **Velasco, R., A. Zharkikh, J. Affourtit, A. Dhingra, A. Cestaro, A. Kalyanaraman, P. Fontana, S.K. Bhatnagar, M. Troggio, D. Pruss et al. 2010.** The genome of the domesticated apple (*Malus × domestica* Borkh.). *Nature Genetics* **42**: 833–839.
26. **Young, N.D., F. Debelle, G.E. Oldroyd, R. Geurts, S.B. Cannon, M.K. Udvardi, V.A. Bedito, K.F. Mayer, J. Gouzy, H. Schoof et al. 2011.** The *Medicago* genome provides insight into the evolution of rhizobial symbioses. *Nature* **480**: 520–524.
27. **Ming, R., R. VanBuren, Y. Liu, M. Yang, Y. Han, L.T. Li, Q. Zhang, M.J. Kim, M.C. Schatz, M. Campbell et al. 2013.** Genome of the long-living sacred lotus (*Nelumbo nucifera* Gaertn.). *Genome Biology* **14**: R41.

28. **Schmutz, J., P.E. McClean, S. Mamidi, G.A. Wu, S.B. Cannon, J. Grimwood, J. Jenkins, S. Shu, Q. Song, C. Chavarro et al. 2014.** A reference genome for common bean and genome-wide analysis of dual domestications. *Nature Genetics* **46**: 707–713.
29. **Tuskan, G.A., S. Difazio, S. Jansson, J. Bohlmann, I. Grigoriev, U. Hellsten, N. Putnam, S. Ralph, S. Rombauts, A. Salamov et al. 2006.** The genome of black cottonwood, *Populus trichocarpa* (Torr. & Gray). *Science* **313**: 1596–1604.
30. **Zhang, Q., W. Chen, L. Sun, F. Zhao, B. Huang, W. Yang, Y. Tao, J. Wang, Z. Yuan, G. Fan et al. 2012.** The genome of *Prunus mume*. *Nature Communications* **3**: 1318.
31. **Verde, I., A.G. Abbott, S. Scalabrin, S. Jung, S. Shu, F. Marroni, T. Zhebentyayeva, M.T. Dettori, J. Grimwood, F. Cattonaro et al. 2013.** The high-quality draft genome of peach (*Prunus persica*) identifies unique patterns of genetic diversity, domestication and genome evolution. *Nature Genetics* **45**: 487–494.
32. **Wu, J., Z. Wang, Z. Shi, S. Zhang, R. Ming, S. Zhu, M.A. Khan, S. Tao, S.S. Korban, H. Wang et al. 2013.** The genome of the pear (*Pyrus bretschneideri* Rehd.). *Genome Research* **23**: 396–408.
33. **Chan, A.P., J. Crabtree, Q. Zhao, H. Lorenzi, J. Orvis, D. Puiu, A. Melake-Berhan, K.M. Jones, J. Redman, G. Chen et al. 2010.** Draft genome sequence of the oilseed species *Ricinus communis*. *Nature Biotechnology* **28**: 951–956.
34. **Cheng, S., E. van den Bergh, P. Zeng, X. Zhong, J. Xu, X. Liu, J. Hofberger, S. de Bruijn, A.S. Bhide, C. Kuelahoglu et al. 2013.** The *Tarenaya hassleriana* genome provides insight into reproductive trait and genome evolution of crucifers. *Plant Cell* **25**: 2813–2830.
35. **Argout, X., J. Salse, J.M. Aury, M.J. Gaultier, G. Droc, J. Gouzy, M. Allegre, C. Chaparro, T. Legavre, S.N. Maximova et al. 2011.** The genome of *Theobroma cacao*. *Nature Genetics* **43**: 101–108.
36. **Jaillon, O., J.M. Aury, B. Noel, A. Policriti, C. Clepet, A. Casagrande, N. Choisne, S. Aubourg, N. Vitulo, C. Jubin et al. 2007.** The grapevine genome sequence suggests ancestral hexaploidization in major angiosperm phyla. *Nature* **449**: 463–467.
37. **Huang, S., J. Ding, D. Deng, W. Tang, H. Sun, D. Liu, L. Zhang, X. Niu, X. Zhang, M. Meng et al. 2013.** Draft genome of the kiwifruit *Actinidia chinensis*. *Nature Communications* **4**: 2640.
38. **Kim, S., M. Park, S.I. Yeom, Y.M. Kim, J.M. Lee, H.A. Lee, E. Seo, J. Choi, K. Cheong, K.T. Kim et al. 2014.** Genome sequence of the hot pepper provides insights into the evolution of pungency in *Capsicum* species. *Nature Genetics* **46**: 270–278.
39. **Hellsten, U., K.M. Wright, J. Jenkins, S. Shu, Y. Yuan, S.R. Wessler, J. Schmutz, J.H. Willis, and D.S. Rokhsar 2013.** Fine-scale variation in meiotic recombination in *Mimulus* inferred from population shotgun sequencing. *Proceedings of the National Academy of Sciences, USA* **110**: 19478–19482.
40. **The Tomato Genome Consortium. 2012.** The tomato genome sequence provides insights into fleshy fruit evolution. *Nature* **485**: 635–641.
41. **Potato Genome Sequencing Consortium. 2011.** Genome sequence and analysis of the tuber crop potato. *Nature* **475**: 189–195.

42. **The International Brachypodium Initiative. 2010.** Genome sequencing and analysis of the model grass *Brachypodium distachyon*. *Nature* **463**: 763–768.
43. **International Rice Genome Sequencing Project. 2005.** The map-based sequence of the rice genome. *Nature* **436**: 793–800.
44. **Bennetzen, J.L., J. Schmutz, H. Wang, R. Percifield, J. Hawkins, A.C. Pontaroli, M. Estep, L. Feng, J.N. Vaughn, J. Grimwood et al. 2012.** Reference genome sequence of the model plant *Setaria*. *Nature Biotechnology* **30**: 555–561.
45. **Paterson, A.H., J.E. Bowers, R. Bruggmann, I. Dubchak, J. Grimwood, H. Gundlach, G. Haberer, U. Hellsten, T. Mitros, A. Poliakov et al. 2009.** The *Sorghum bicolor* genome and the diversification of grasses. *Nature*, **457**: 551–556.
46. **D'Hont, A., F. Denoeud, J.M. Aury, F.C. Baurens, F. Carreel, O. Garsmeur, B. Noel, S. Bocs, G. Droc, M. Rouard et al. 2012.** The banana (*Musa acuminata*) genome and the evolution of monocotyledonous plants. *Nature* **488**: 213–217.
47. **Schnable, P.S., D. Ware, R.S. Fulton, J.C. Stein, F. Wei, S. Pasternak, C. Liang, J. Zhang, L. Fulton, T.A. Graves et al. 2009.** The B73 maize genome: complexity, diversity, and dynamics. *Science* **326**: 1112–1115.
48. **Singh, R., M. Ong-Abdullah, E.T. Low, M.A. Manaf, R. Rosli, R. Nookiah, L.C. Ooi, S.E. Ooi, K.L. Chan, M.A. Halim et al. 2013.** Oil palm genome sequence reveals divergence of interfertile species in Old and New worlds. *Nature* **500**: 335–339.

**Table S2** Annotation of the Brassicaceae SUMO paralogs including expression details.  
(See the separate Excel file.)

**Table S3** Gene IDs of the here studied dicot *SUMO/SUL* genes in the three different genomic regions: SUMO- $\gamma$ A (*AtSUMO4*), SUMO- $\gamma$ B (*AtSUMO1/2*), and *SUL*- $\gamma$ C (*AtSUMO5*). Three ancient SUMO gene clusters are found in the genomes of eudicots. One cluster represents an ancient highly divergent SUMO-like UBL family (*AtSUMO5*), while the other two genomic clusters contain archetype *SUMO* genes (*AtSUMO1*) except for Brassicaceae (*AtSUMO4*). The gene IDs given are obtained from CoGE ([genomeevolution.org/](http://genomeevolution.org/)), PGDD ([chibba.agtec.uga.edu/duplication/](http://chibba.agtec.uga.edu/duplication/)), or Phytozome 10 ([phytozome.jgi.doe.gov/](http://phytozome.jgi.doe.gov/)) data repositories. *SUL* sequences are indicated by a red gene ID.

| Species                                            | Taxons                |                                                                                      | Syntenic homologs                                                                                      |                                                         |                                                                                                                 |
|----------------------------------------------------|-----------------------|--------------------------------------------------------------------------------------|--------------------------------------------------------------------------------------------------------|---------------------------------------------------------|-----------------------------------------------------------------------------------------------------------------|
|                                                    |                       |                                                                                      | SUMO $\gamma$ -B                                                                                       | SUMO $\gamma$ -A                                        | SUL $\gamma$ -C                                                                                                 |
| <i>Nelumbo nucifera</i>                            | <b>Proteales</b>      |                                                                                      | ND <sup>1</sup>                                                                                        | NNU_022372-RA                                           |                                                                                                                 |
| <i>Beta vulgaris</i>                               | <b>Caryophyllales</b> |                                                                                      | Bv4_087850_dyxu                                                                                        | ND                                                      | Bv3_068150_orpx #                                                                                               |
| <i>Actinidia chinensis</i>                         | <b>Asterids</b>       |                                                                                      | ND                                                                                                     | Achn127311<br>Achn307081 <sup>2</sup>                   | Achn266161::<br>Achn266171                                                                                      |
| <i>Capsicum annuum</i>                             |                       |                                                                                      | CA07g19790                                                                                             | ND                                                      | CA03g01160 #                                                                                                    |
| <i>Solanum lycopersici</i>                         |                       |                                                                                      | Solyc07g049360.2<br>Solyc07g064880.2<br>Solyc12g006010.1 <sup>3</sup>                                  | Solyc09g059970.2                                        | Solyc09g091890.2 #                                                                                              |
| <i>Solanum tuberosum</i>                           |                       |                                                                                      | PGSC0003DMC400038444<br>PGSC0003DMC400001311<br>PGSC0003DMC400024516 <sup>3</sup>                      | ND                                                      | PGSC0003DMC400054530<br>::<br>PGSC0003DMC400054531<br>#                                                         |
| <i>Vitis vinifera</i>                              |                       |                                                                                      | <b>Vitales</b>                                                                                         | GSVIVT01030502001                                       | GSVIVT01003301001 <sup>4</sup><br>GSVIVG01003307001 <sup>4</sup>                                                |
| <i>Eucalyptus grandis</i>                          | <b>Myrtales</b>       | Eucgr.K00755::<br>Eucgr.K00756<br>(Egrandis_v1_0.037737m::<br>Egrandis_v1_0.033394m) | Eucgr.H00789<br>(Egrandis_v1_0.039699m)                                                                | <b>Eucgr.H00049 #</b><br>(Egrandis_v1_0.046213m)        |                                                                                                                 |
| <i>Phaseolus vulgaris</i>                          | <b>Fabales</b>        | <b>Fabidae</b>                                                                       | Phvul.006G047600                                                                                       | Phvul.008G129000                                        | Phvul.003G291000 #                                                                                              |
| <i>Glycine max</i>                                 |                       |                                                                                      |                                                                                                        |                                                         |                                                                                                                 |
| <i>Fragaria vesca</i>                              | <b>Rosales</b>        | <b>Fabidae</b>                                                                       | mrna01213,<br>mrna03443                                                                                | mrna17600                                               | mrna06159                                                                                                       |
| <i>Pyrus bretschneideri</i>                        |                       |                                                                                      | Pbr005170.1<br>Pbr024463.1<br>Pbr039768.1                                                              | Pbr012819.1<br>Pbr025468.1 <sup>2</sup><br>Pbr033049.1  | Pbr030915.1::<br>Pbr030916.1 #                                                                                  |
| <i>Prunus mume</i>                                 |                       |                                                                                      | Pm015148,<br>Pm011903<br>Pm012555                                                                      | Pm020340                                                | Pm009507 <sup>2</sup>                                                                                           |
| <i>Prunus persica</i>                              |                       |                                                                                      | ppa012976m,<br>ppa023777m::<br>ppa013753m::ppa013880m<br>ppa023122m                                    | ppa013826m                                              | ppa014098m                                                                                                      |
| <i>Citrullus lanatus</i>                           |                       |                                                                                      | Clao05336<br>Clao13517<br>Clao16281                                                                    | ND                                                      | ND                                                                                                              |
| <i>Cucumis sativus</i>                             | <b>Cucurbitales</b>   | <b>Eurosidids</b>                                                                    | 16952982::16952983,<br>16967643,<br>16982462::16982463                                                 | ND                                                      | ND                                                                                                              |
| <i>Ricinus communis</i>                            | <b>Malpighiales</b>   | <b>Eurosidids</b>                                                                    | 29762.m000499                                                                                          | 30204.m001744                                           | 29904.m002927 #                                                                                                 |
| <i>Populus trichocarpa</i>                         | <b>Malpighiales</b>   | <b>Eurosidids</b>                                                                    | Potri.002G224700::<br>Potri.002G224800,<br>Potri.014G158300                                            | Potri.014G190300                                        | ND                                                                                                              |
| <i>Gossypium raimondii</i>                         | <b>Brassicales</b>    | <b>Malvidae</b>                                                                      | Gorai.001G095200 <sup>5</sup><br>Gorai.001G216800 <sup>5</sup><br>Gorai.009G442500<br>Gorai.013G158500 | Gorai.004G058800                                        | Gorai.009G349100 <sup>4</sup> #                                                                                 |
| <i>Theobroma cacao</i>                             |                       |                                                                                      | Thecc1EG002167<br>(Tc01_g017640)                                                                       | Thecc1EG002904<br>(Tc01_g021470)                        | Thecc1EG020307 #,<br>Thecc1EG020389::<br>Thecc1EG020390 #<br>(Tc04_g021070::<br>Tc04_g021080::<br>Tc04_g021100) |
| <i>Citrus sinensis</i><br><i>Citrus clementina</i> |                       |                                                                                      | orange1.lg034926m<br>Ciclev10017283m                                                                   | orange1.lg034043m<br>Ciclev10022993m                    | orange1.lg048514m::<br>orange1.lg045424m <sup>3</sup> #,<br>Ciclev10006329m <sup>3</sup>                        |
| <i>Carica papaya</i>                               |                       |                                                                                      | evm.TU.supercontig_132.24                                                                              | evm.TU.supercontig_8.130                                | ND                                                                                                              |
| <i>Tarenaya hassleriana</i>                        |                       |                                                                                      | Th15536<br>Th11421<br>Th20205 <sup>6</sup>                                                             | Th20051,<br>Th26484::Th26485::<br>Th26486 (partial SUM4 | Th15853 <sup>7</sup>                                                                                            |

|                     |  |  |  |                                                                                    |                                          |                          |
|---------------------|--|--|--|------------------------------------------------------------------------------------|------------------------------------------|--------------------------|
|                     |  |  |  |                                                                                    |                                          |                          |
|                     |  |  |  |                                                                                    | like)                                    |                          |
| <i>Brassicaceae</i> |  |  |  | <b>SUMO1</b> (At4g26840),<br><b>SUMO2::SUMO3</b><br>(At5g55160: <b>At5g55170</b> ) | <b>SUMO4::SUMO6</b><br>(AT5G48700, -710) | <b>SUMO5</b> (At2g32765) |

- 1, *ND* indicates that a syntenic paralog was not found in the full genome assembly.
  - 2, Gene fusion or misannotation in the genome assembly.
  - 3, SUMO-like sequences, Solanaceae-specific gene duplication.
  - 4, Not contained in PGDD block.
  - 5, This genomic region appears to correspond to SUMO5 in Arabidopsis, but it resembles the SUMO1 genomic region in Papaya.
  - 6, Potential pseudogene – sequence is incomplete and diglycine motif is absent.
  - 7, Missannotation in the genome assembly, i.e. gene fusion of a *SUMO5* paralog with an upstream gene.
- #, Indicates that the diglycine motif is present.
- ::, Indicates a tandem duplication of SUMO(-like) genes at one locus.



**Table S4** Summary of the synteny between *A. lyrata* *SUMO5* (ID: 16062200; Al4g17860) and the *SUMO* and *SUL* genes of the basal eudicots grape vine (*V. vinifera*) and eucalyptus (*E. grandis*).

| Species            | Gene ID                        |                               | Number of Anchors              |                               |
|--------------------|--------------------------------|-------------------------------|--------------------------------|-------------------------------|
|                    | <i>SUMO1</i><br><i>SUMO-γB</i> | <i>SUMO5</i><br><i>SUL-γC</i> | <i>SUMO1</i><br><i>SUMO-γB</i> | <i>SUMO5</i><br><i>SUL-γC</i> |
| <i>V. vinifera</i> | GSVIVT01030502001              | GSVIVT01021058001             | 14                             | 30                            |
| <i>E. grandis</i>  | Eucgr.K00755                   | Eucgr.H00049                  | 7                              | 12                            |
